# Supplementary material
Source: PubMed Central journal article supplement (PMC2993335)
Supplement: 1011616107_pnas.201011616SI.pdf [file 1011616107_pnas.201011616SI.pdf]

# Supporting Information

Anderson et al. 10.1073/pnas.1011616107

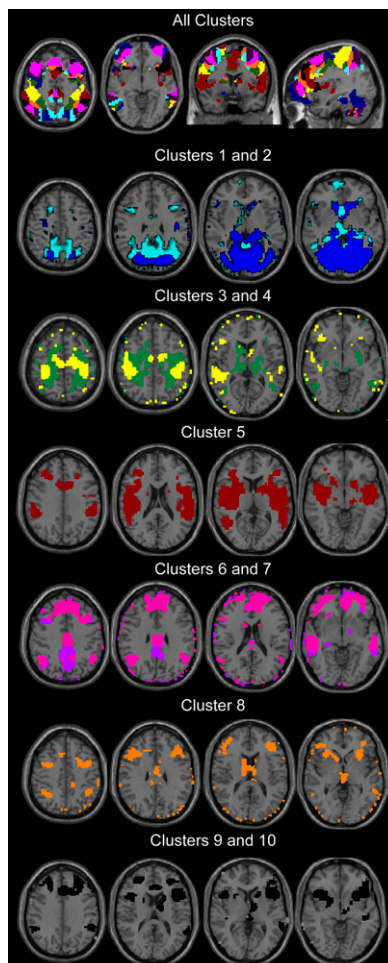

**Fig. S1.** Maximal correlation to each of 10 left IPS clusters. (*Upper*) Colored voxels are those showing correlation to initial right IPS seed region across 58 subjects with  $T > 8$ . Voxels are colored to correspond to the left IPS cluster with which the voxel showed highest correlation. Slice locations are  $z = 50$ ,  $z = -5$ ,  $y = 7$ ,  $x = 38$ . (*Lower*) Each voxel in the brain was assigned to the left IPS cluster with which it exhibited highest correlation. Areas of highest correlation to each cluster are shown separately (two clusters are shown together in four cases where the clusters are correlated to similar brain regions.) The colors match the cluster locations shown above.

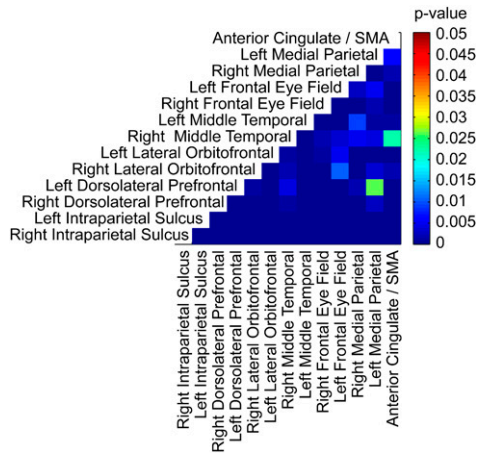

**Fig. S2.** Significance of topographic organization for 78 pairs of 13 regions. For each region pair and each subject, mean correlation between ROIs corresponding to the same clusters and mean correlation between ROIs corresponding to different clusters within the two regions were measured. Each box shows the *P* value corresponding to the one-tailed *t* test comparing the same cluster and different cluster measurements across 58 subjects.

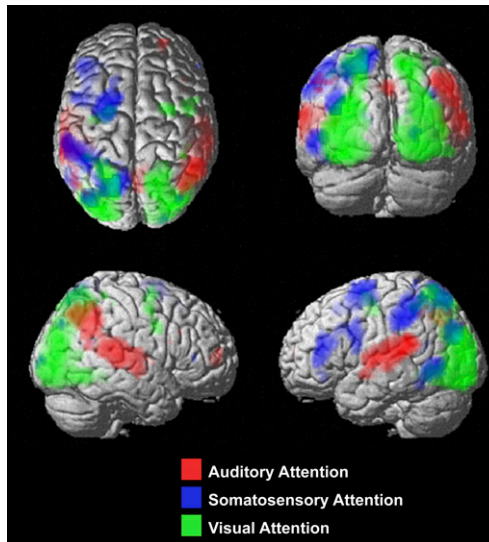

**Fig. S3.** Rendered images showing greatest brain activity with attention to different sensory modalities. Results were obtained from 16 subjects, showing brain regions with activity greater for auditory attention blocks (red), somatosensory attention blocks (blue), or visual attention blocks (green) than for the mean activity of all other blocks. Results are thresholded for display at  $P < 0.001$ , uncorrected. The somatosensory attention condition was strongly left lateralized.

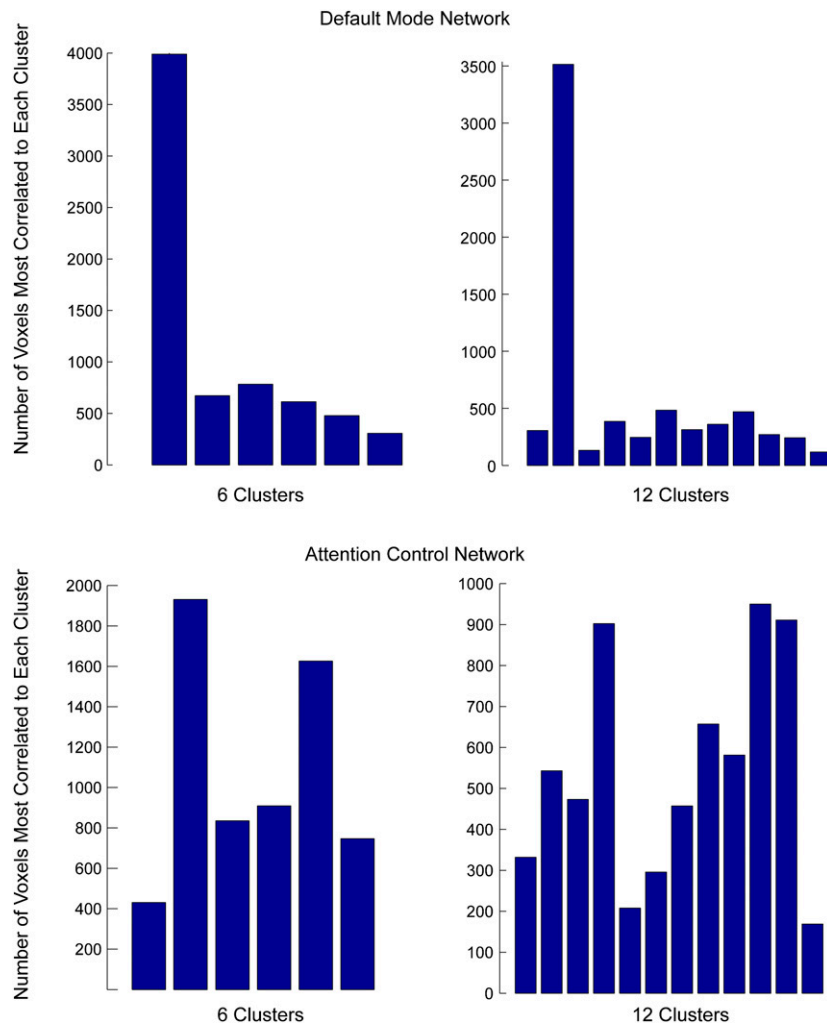

**Fig. S4.** Size of clusters for the default mode and attention control networks. The number of voxels most correlated to each cluster is shown for the default mode and attention control networks for the 6- and 12-cluster conditions. One dominant cluster is seen in each case for the default mode network, but not for the attention control network.
